# Supplementary material for: Use of Cumulative Live Birth Rate per Total Number of Embryos to Calculate the Success of IVF in Consecutive IVF Cycles in Women Aged ≥35 Years
Source: Hindawi journal article supplement (doi:10.1155/2019/6159793), 2019-06-26
Supplement: f1 [file 6159793.f1.pdf]

Supplementary table1

| No. of embryo transferred | Begin total patient | Group patient | No. of live birth | No. of failure | Cumulative probability | Standard Error |
|---------------------------|---------------------|---------------|-------------------|----------------|------------------------|----------------|
| 1                         | 1344                | 195           | 47                | 148            | 0.0350                 | 0.005          |
| 2                         | 1149                | 404           | 172               | 232            | 0.1794                 | 0.011          |
| 3                         | 745                 | 211           | 64                | 147            | 0.2499                 | 0.0131         |
| 4                         | 534                 | 203           | 67                | 136            | 0.3440                 | 0.0157         |
| 5                         | 331                 | 111           | 34                | 77             | 0.4114                 | 0.0179         |
| 6                         | 220                 | 78            | 25                | 53             | 0.4783                 | 0.0202         |
| 7                         | 142                 | 45            | 15                | 30             | 0.5334                 | 0.0225         |
| 8                         | 97                  | 46            | 19                | 27             | 0.6248                 | 0.0261         |
| 9                         | 51                  | 20            | 8                 | 12             | 0.6837                 | 0.0292         |
| 10                        | 31                  | 13            | 2                 | 11             | 0.7041                 | 0.0306         |
| 11                        | 18                  | 6             | 1                 | 5              | 0.7205                 | 0.0331         |
| 12                        | 12                  | 4             | 1                 | 3              | 0.7438                 | 0.0376         |
| 13                        | 8                   | 5             | 1                 | 4              | 0.7758                 | 0.0445         |
| 14                        | 3                   | 2             | 1                 | 1              | 0.8505                 | 0.0678         |
| 15                        | 1                   | 1             | 0                 | 1              | 0.8505                 | 0.0678         |
